# Supplementary material
Source: PubMed Central journal article supplement (PMC3774928)
Supplement: jcbn13-28s01.pdf [file jcbn13-28s01.pdf]

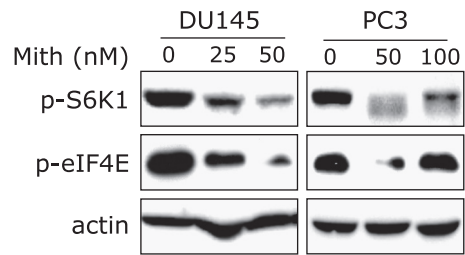

**Supplemental Fig. 1.** Mithramycin A down-regulates phosphorylation of S6K1 and eIF4E in human prostate cancer cells. Levels of p-S6K1 and p-eIF4E were analyzed by western blot analysis in DU145 and PC3 cells.
